# Supplementary material for: Green and all-carbon asymmetric supercapacitor based on polyaniline nanotubes and anthraquinone functionalized porous nitrogen-doped carbon nanotubes with high energy storage performance
Source: Royal Society of Chemistry journal article supplement (doi:10.1039/c5ra09943a), 2015-01-01
Supplement: c5ra09943a1.pdf [file c5ra09943a1.pdf]

## Electronic Supplementary Information

### Green and All-carbon Asymmetric Supercapacitor Based on Polyaniline Nanotubes and Anthraquinone Functionalized Porous Nitrogen-doped Carbon Nanotubes with High Energy Storage Performance

*Ning An, Yufeng An, Zhongai Hu\*, Yadi Zhang, Yuying Yang, Ziqiang Lei*

Key Laboratory of Eco-Environment-Related Polymer Materials of Ministry of Education, Key Laboratory of Polymer Materials of Gansu Province, College of Chemistry and Chemical Engineering, Northwest Normal University, Lanzhou, Gansu 730070, China.

#### Calculations of specific capacitance, energy density and power density based on the galvanostatic charge-discharge curves:

(1) In three-electrode configuration, specific capacitances derived from galvanostatic tests can be calculated from the equation:

$$C = I\Delta t/m\Delta V \quad (1)$$

where  $I$  (A) is the discharging current,  $\Delta t$  (s) is the discharge time,  $\Delta V$  (V) is the voltage interval of discharge, and  $m$  (g) is the mass of active material in the working electrode.

(2) In two-electrode asymmetric cell configuration, specific capacitances derived from galvanostatic tests can be calculated from the equation:

$$C = I\Delta t/m\Delta V \quad (2)$$

where  $I$  (A) is the constant discharge current,  $\Delta t$  (s) is the discharging time,  $m$  (g) is the total mass of two electrodes, and  $\Delta V$  (V) is the voltage interval of discharge.

Energy density ( $E$ ) and power density ( $P$ ) derived from galvanostatic tests can be calculated from the following equations:

$$E = 0.5C (\Delta V)^2 \quad (3)$$

$$P = E/\Delta t \quad (4)$$

---

\*Corresponding author. Tel.: +86 931 7973255; Fax: +86 931 8859764.  
E-mail address: [zhongai@nwnu.edu.cn](mailto:zhongai@nwnu.edu.cn) (Zhong-ai Hu)

where  $C$  ( $F\ g^{-1}$ ) is the capacitance of the two-electrode capacitor,  $\Delta V$  (V) is the voltage decrease in discharge and  $\Delta t$  (s) is the time spent in discharge, respectively.

**The calculation formula for the mass of AQ:**

$$Q = \int I dt = \int_{V_a}^{V_b} \frac{I}{\frac{dV}{dt}} dV = \frac{1}{V} \int_{V_a}^{V_b} I dV \quad (1)$$

$$m_A = n_A \cdot M_A = \frac{\Delta Q}{z \cdot F} M_A \quad (2)$$

where  $Q$  (C),  $I$  (A),  $t$  (s),  $V$  (V),  $m_A$  (g),  $n_A$  (mol),  $M_A$  ( $\text{mol g}^{-1}$ ),  $F$  and  $z$  are voltammetric charge, instantaneous anodic (cathodic) current at a given potential range, sampling time, potential range, material mass taking part in redox reaction, amount of substance of active materials, molar mass of active materials, Faraday constant and stoichiometric coefficient of electron transport in electrochemical processes while  $V_a$  and  $V_b$  (V) are the selected boundary of potential range, respectively.  $\Delta Q$  (C) is defined as a charge contributed by cathodic or anodic reaction of AQ, which is numerically equal to the integral area of the region (S1 or S2) as shown in Fig. 5a.

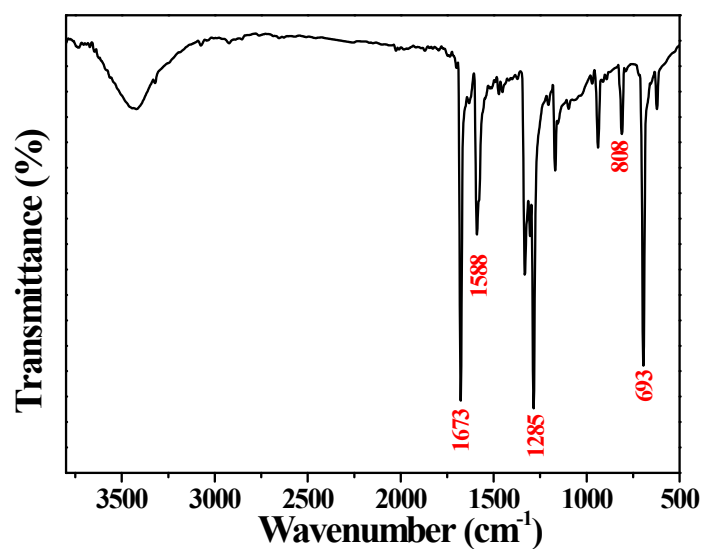

Fig. S1 FT-IR spectra of AQ.

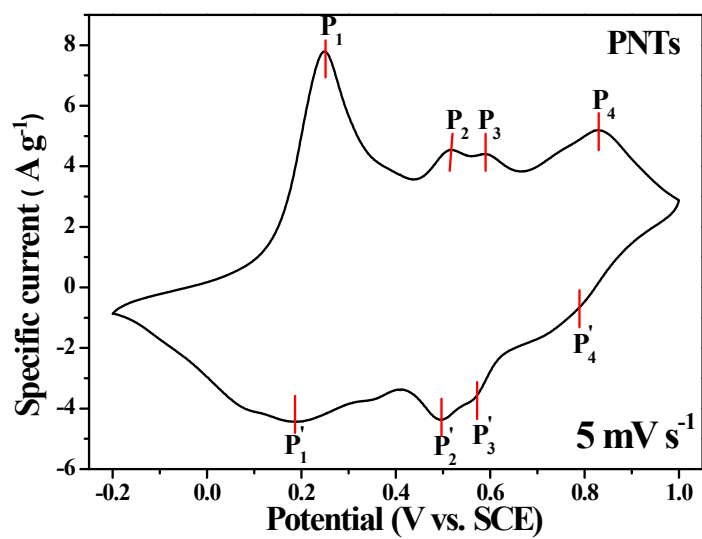

Fig. S2 CV curve of PNTs at 5 mV s<sup>-1</sup> in 1 M H<sub>2</sub>SO<sub>4</sub> aqueous solution.

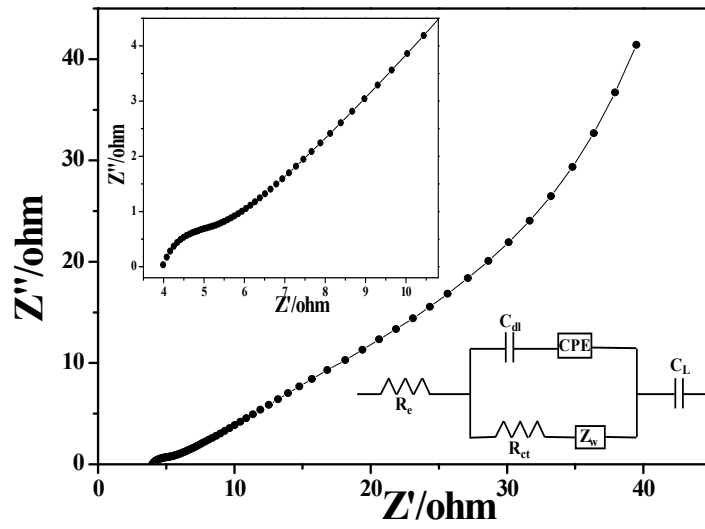

**Fig. S3** Nyquist plots of AQ@PNCNTs//PNTs ASC (the inset of modeled equivalent circuit of electrochemical impedance spectroscopy).

**Table S1** The specific surface area and pore parameters of samples.

| Sample    | BET surface area<br>(m <sup>2</sup> g <sup>-1</sup> ) | Pore volume<br>(cm <sup>3</sup> g <sup>-1</sup> ) | Average pore width<br>(nm) |
|-----------|-------------------------------------------------------|---------------------------------------------------|----------------------------|
| PNTs      | 23.96                                                 | 0.138                                             | 229.86                     |
| PNCNTs    | 1753.69                                               | 1.151                                             | 28.73                      |
| AQ@PNCNTs | 1005.51                                               | 0.722                                             | 26.24                      |

**Table S2** The electrochemical parameters of redox peaks on the AQ@PNCNTs CV curves: The anodic and cathodic potential ( $E_{pa}$  and  $E_{pc}$ ), the peak potential separation ( $E_{ps}$ ), the mass anodic and cathodic peak current ( $i_{pa}$  and  $i_{pc}$ ) and the peaks current ratio ( $i_{pa}/i_{pc}$ ).

| The scan rate         | $E_{pa}$ (V) | $E_{pc}$ (V) | $E_{ps}$ (V) | $i_{pa}$ (A g <sup>-1</sup> ) | $i_{pc}$ (A g <sup>-1</sup> ) | $i_{pa}/i_{pc}$ |
|-----------------------|--------------|--------------|--------------|-------------------------------|-------------------------------|-----------------|
| 5 mV s <sup>-1</sup>  | -0.0945      | -0.1069      | 0.0124       | 14.03                         | 13.64                         | 1.0286          |
| 10 mV s <sup>-1</sup> | -0.0889      | 0.1110       | 0.0221       | 26.29                         | 25.90                         | 1.0151          |
| 20 mV s <sup>-1</sup> | -0.0835      | -0.1149      | 0.0314       | 38.13                         | 37.47                         | 1.0176          |
| 30 mV s <sup>-1</sup> | -0.0789      | -0.1213      | 0.0424       | 49.53                         | 48.00                         | 1.0319          |
| 40 mV s <sup>-1</sup> | -0.0718      | -0.1243      | 0.0525       | 71.64                         | 69.38                         | 1.0326          |
| 50 mV s <sup>-1</sup> | -0.0647      | -0.1342      | 0.0695       | 109.71                        | 107.03                        | 1.0250          |
